# Supplementary material for: Ni-Mediated Cascade Synthesis of a Vinylene-Linked Terrylene Diimide Dimer with Symmetry-Breaking Charge Separation Character
Source: Research Square preprint supplement (doi:10.21203/rs.3.rs-7196099/v1), 2025-08-06

## checkCIF/PLATON report

You have not supplied any structure factors. As a result the full set of tests cannot be run.

THIS REPORT IS FOR GUIDANCE ONLY. IF USED AS PART OF A REVIEW PROCEDURE FOR PUBLICATION, IT SHOULD NOT REPLACE THE EXPERTISE OF AN EXPERIENCED CRYSTALLOGRAPHIC REFEREE.

No syntax errors found.      CIF dictionary      Interpreting this report

### Datablock: lgg\_tdi\_2cl\_1th\_re\_0m\_a\_zhubin\_sq

---

Bond precision:      C-C = 0.0087 Å      Wavelength=1.54178

Cell:                      a=15.6119(6)              b=16.2521(7)              c=21.8143(8)  
                                alpha=90              beta=104.986(3)              gamma=90

Temperature:              180 K

|                        | Calculated                       | Reported          |
|------------------------|----------------------------------|-------------------|
| Volume                 | 5346.6(4)                        | 5346.6(4)         |
| Space group            | P 21/c                           | P 1 21/c 1        |
| Hall group             | -P 2ybc                          | -P 2ybc           |
| Moiety formula         | C58 H44 Cl2 N2 O4 [+<br>solvent] | C58 H44 Cl2 N2 O4 |
| Sum formula            | C58 H44 Cl2 N2 O4 [+<br>solvent] | C58 H44 Cl2 N2 O4 |
| Mr                     | 903.85                           | 903.85            |
| Dx, g cm <sup>-3</sup> | 1.123                            | 1.123             |
| Z                      | 4                                | 4                 |
| Mu (mm <sup>-1</sup> ) | 1.443                            | 1.443             |
| F000                   | 1888.0                           | 1888.0            |
| F000'                  | 1895.92                          |                   |
| h, k, lmax             | 18, 19, 25                       | 18, 19, 25        |
| Nref                   | 9117                             | 8733              |
| Tmin, Tmax             | 0.771, 0.917                     | 0.571, 0.753      |
| Tmin'                  | 0.749                            |                   |

Correction method= # Reported T Limits: Tmin=0.571 Tmax=0.753  
AbsCorr = MULTI-SCAN

Data completeness= 0.958                      Theta(max)= 65.079

R(reflections)= 0.1180( 6198)

wR2(reflections)=  
0.3304( 8733)

S = 1.123

Npar= 603

The following ALERTS were generated. Each ALERT has the format

**test-name\_ALERT\_alert-type\_alert-level.**

Click on the hyperlinks for more details of the test.

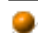

#### Alert level B

PLAT029\_ALERT\_3\_B \_diffn\_measured\_fraction\_theta\_full value Low . 0.958 Why?

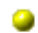

#### Alert level C

THETM01\_ALERT\_3\_C The value of sine(theta\_max)/wavelength is less than 0.590

Calculated sin(theta\_max)/wavelength = 0.5882

|                                                                  |         |        |
|------------------------------------------------------------------|---------|--------|
| PLAT082_ALERT_2_C High R1 Value .....                            | 0.12    | Report |
| PLAT084_ALERT_3_C High wR2 Value (i.e. > 0.25) .....             | 0.33    | Report |
| PLAT213_ALERT_2_C Atom O008 has ADP max/min Ratio .....          | 3.1     | prolat |
| PLAT220_ALERT_2_C NonSolvent Resd 1 C Ueq(max)/Ueq(min) Range    | 3.4     | Ratio  |
| PLAT241_ALERT_2_C High 'MainMol' Ueq as Compared to Neighbors of | C010    | Check  |
| PLAT242_ALERT_2_C Low 'MainMol' Ueq as Compared to Neighbors of  | C016    | Check  |
| PLAT242_ALERT_2_C Low 'MainMol' Ueq as Compared to Neighbors of  | C01H    | Check  |
| PLAT242_ALERT_2_C Low 'MainMol' Ueq as Compared to Neighbors of  | C01K    | Check  |
| PLAT250_ALERT_2_C Large U3/U1 Ratio for <U(i,j)> Tensor(Resd 1)  | 2.4     | Note   |
| PLAT340_ALERT_3_C Low Bond Precision on C-C Bonds .....          | 0.00866 | Ang.   |

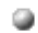

#### Alert level G

|                                                                   |        |        |
|-------------------------------------------------------------------|--------|--------|
| PLAT012_ALERT_1_G No _shelx_res_checksum Found in CIF .....       | Please | Check  |
| PLAT014_ALERT_1_G No _shelx_fab_checksum Found in CIF .....       | Please | Check  |
| PLAT072_ALERT_2_G SHELXL First Parameter in WGHT Unusually Large  | 0.12   | Report |
| PLAT083_ALERT_2_G SHELXL Second Parameter in WGHT Unusually Large | 20.19  | Why ?  |
| PLAT333_ALERT_2_G Large Aver C6-Ring C-C Dist C009 -C00L .        | 1.44   | Ang.   |
| PLAT434_ALERT_2_G Short Inter HL..HL Contact C100 ..C100 .        | 3.33   | Ang.   |

1-x,1-y,1-z = 3\_666 Check

|                                                                 |     |      |
|-----------------------------------------------------------------|-----|------|
| PLAT606_ALERT_4_G Solvent Accessible VOID(S) in Structure ..... | !   | Info |
| PLAT720_ALERT_4_G Number of Unusual/Non-Standard Labels .....   | 108 | Note |

|      |      |      |      |      |      |      |      |
|------|------|------|------|------|------|------|------|
| C100 | O003 | O004 | O005 | N006 | N007 | O008 | C009 |
| C00A | C00B | C00C | C00D | C00E | C00F | C00G | C00H |
| C00I | C00J | C00K | C00L | C00M | C00N | C00O | H00O |
| C00P | C00Q | C00R | C00S | C00T | C00U | H00U | C00V |
| H00V | C00W | C00X | C00Y | C00Z | H00Z | C010 | C011 |
| H011 | C012 | C013 | H013 | C014 | H014 | C015 | H015 |
| C016 | H016 | C017 | C018 | C019 | H019 | C01A | H01A |
| C01B | H01B | C01C | C01D | C01E | H01E | C01F | H01F |
| C01G | H01G | C01H | H01H | C01I | H01I | C01J | H01J |
| C01K | H01K | C01L | H01C | H01D | H01L | C01M | H01M |
| H01N | H01O | C01N | C01O | H01P | C01P | H01Q | H01R |
| H01S | C01Q | H01T | H01U | H01V | C01S | H01W | H01X |
| H01Y | C01T | H01Z | Ha   | C01U | H01  | Hb   | Hc   |
| C01W | H0AA | Hd   | He   |      |      |      |      |

|                                                                   |   |      |
|-------------------------------------------------------------------|---|------|
| PLAT869_ALERT_4_G ALERTS Related to the Use of SQUEEZE Suppressed | ! | Info |
|-------------------------------------------------------------------|---|------|

|                                                                    |        |      |
|--------------------------------------------------------------------|--------|------|
| PLAT883_ALERT_1_G No Info/Value for _atom_sites_solution_primary . | Please | Do ! |
|--------------------------------------------------------------------|--------|------|

|                                                                    |   |      |
|--------------------------------------------------------------------|---|------|
| PLAT933_ALERT_2_G Number of HKL-OMIT Records in Embedded .res File | 3 | Note |
|--------------------------------------------------------------------|---|------|

1 1 1, -14 3 19, -4 17 9,

---

0 **ALERT level A** = Most likely a serious problem - resolve or explain  
1 **ALERT level B** = A potentially serious problem, consider carefully  
11 **ALERT level C** = Check. Ensure it is not caused by an omission or oversight  
11 **ALERT level G** = General information/check it is not something unexpected

3 ALERT type 1 CIF construction/syntax error, inconsistent or missing data  
13 ALERT type 2 Indicator that the structure model may be wrong or deficient  
4 ALERT type 3 Indicator that the structure quality may be low  
3 ALERT type 4 Improvement, methodology, query or suggestion  
0 ALERT type 5 Informative message, check

---

It is advisable to attempt to resolve as many as possible of the alerts in all categories. Often the minor alerts point to easily fixed oversights, errors and omissions in your CIF or refinement strategy, so attention to these fine details can be worthwhile. In order to resolve some of the more serious problems it may be necessary to carry out additional measurements or structure refinements. However, the purpose of your study may justify the reported deviations and the more serious of these should normally be commented upon in the discussion or experimental section of a paper or in the "special\_details" fields of the CIF. checkCIF was carefully designed to identify outliers and unusual parameters, but every test has its limitations and alerts that are not important in a particular case may appear. Conversely, the absence of alerts does not guarantee there are no aspects of the results needing attention. It is up to the individual to critically assess their own results and, if necessary, seek expert advice.

### Publication of your CIF in IUCr journals

A basic structural check has been run on your CIF. These basic checks will be run on all CIFs submitted for publication in IUCr journals (*Acta Crystallographica*, *Journal of Applied Crystallography*, *Journal of Synchrotron Radiation*); however, if you intend to submit to *Acta Crystallographica Section C* or *E* or *IUCrData*, you should make sure that full publication checks are run on the final version of your CIF prior to submission.

### Publication of your CIF in other journals

Please refer to the *Notes for Authors* of the relevant journal for any special instructions relating to CIF submission.

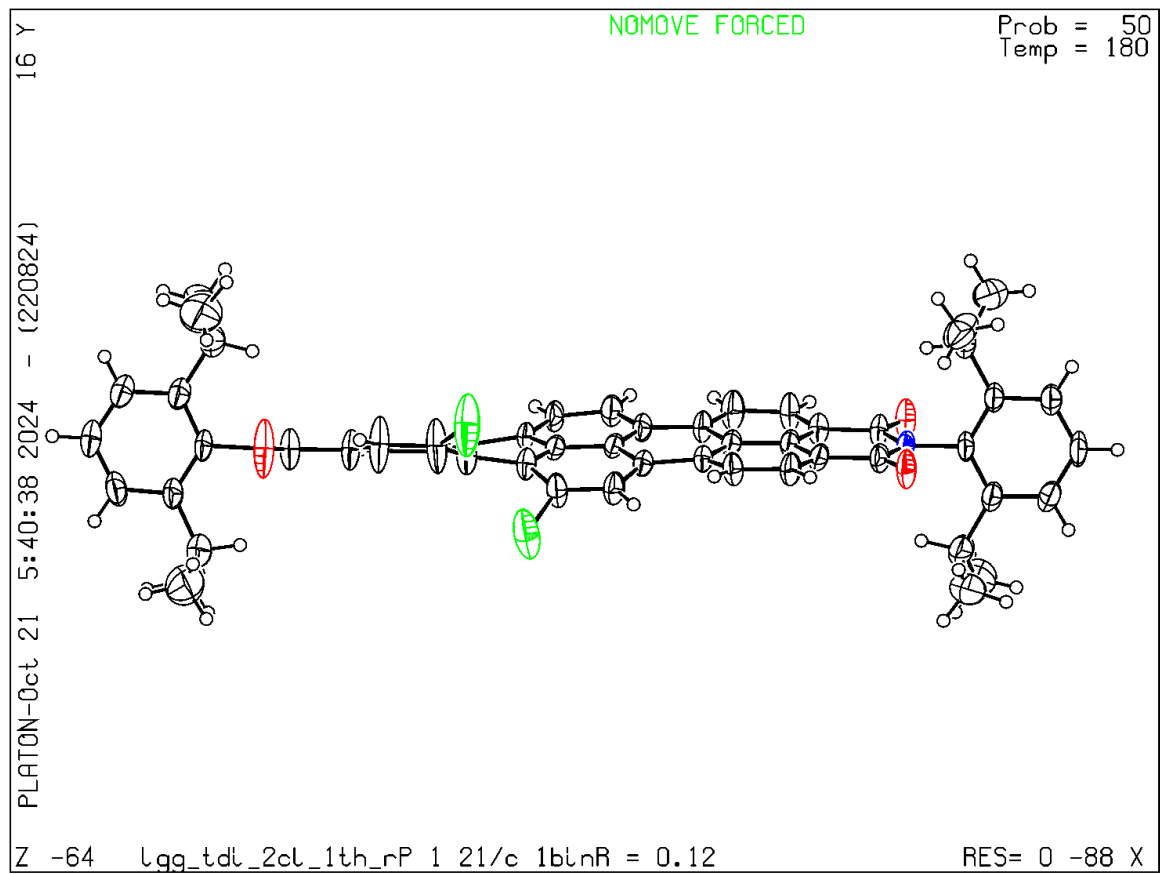

Supplement: Supplementary file 2 [file checkcif of 2Cl-TDI.pdf › checkcif of 2Cl-TDI.pdf]
