# Supplementary material for: Ni-Mediated Cascade Synthesis of a Vinylene-Linked Terrylene Diimide Dimer with Symmetry-Breaking Charge Separation Character
Source: Research Square preprint supplement (doi:10.21203/rs.3.rs-7196099/v1), 2025-08-06

## checkCIF/PLATON report

Structure factors have been supplied for datablock(s) LGG\_TDI\_8\_6TH\_0m\_sq\_sq\_sq

THIS REPORT IS FOR GUIDANCE ONLY. IF USED AS PART OF A REVIEW PROCEDURE FOR PUBLICATION, IT SHOULD NOT REPLACE THE EXPERTISE OF AN EXPERIENCED CRYSTALLOGRAPHIC REFEREE.

No syntax errors found.      CIF dictionary      Interpreting this report

### Datablock: LGG\_TDI\_8\_6TH\_0m\_sq\_sq\_sq

---

Bond precision:      C-C = 0.0115 Å      Wavelength=1.54178

Cell:                      a=14.1622 (18)                      b=40.113 (6)                      c=44.706 (6)  
                             alpha=112.494 (6)                      beta=92.089 (5)                      gamma=99.573 (5)  
Temperature:              180 K

|                        | Calculated                 | Reported       |
|------------------------|----------------------------|----------------|
| Volume                 | 22998 (6)                  | 22998 (6)      |
| Space group            | P -1                       | P -1           |
| Hall group             | -P 1                       | -P 1           |
| Moiety formula         | C118 H88 N4 O8 [+ solvent] | ?              |
| Sum formula            | C118 H88 N4 O8 [+ solvent] | C118 H88 N4 O8 |
| Mr                     | 1689.93                    | 1689.92        |
| Dx, g cm <sup>-3</sup> | 0.976                      | 0.976          |
| Z                      | 8                          | 8              |
| Mu (mm <sup>-1</sup> ) | 0.480                      | 0.480          |
| F000                   | 7104.0                     | 7104.0         |
| F000'                  | 7124.24                    |                |
| h, k, lmax             | 15, 44, 49                 | 15, 44, 49     |
| Nref                   | 66812                      | 66478          |
| Tmin, Tmax             | 0.944, 0.953               | 0.536, 0.752   |
| Tmin'                  | 0.908                      |                |

Correction method= # Reported T Limits: Tmin=0.536 Tmax=0.752  
AbsCorr = MULTI-SCAN

Data completeness= 0.995      Theta(max)= 59.299

|                                 |                   |
|---------------------------------|-------------------|
| R(reflections)= 0.1186 ( 26939) | wR2(reflections)= |
| S = 1.198                       | 0.3187 ( 66478)   |
| Npar= 4658                      |                   |

---

The following ALERTS were generated. Each ALERT has the format

**test-name\_ALERT\_alert-type\_alert-level.**

Click on the hyperlinks for more details of the test.

---

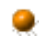

### Alert level B

THETM01\_ALERT\_3\_B The value of  $\sin(\theta_{\max})/\text{wavelength}$  is less than 0.575

Calculated  $\sin(\theta_{\max})/\text{wavelength} = 0.5577$

PLAT340\_ALERT\_3\_B Low Bond Precision on C-C Bonds ..... 0.01146 Ang.

---

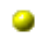

### Alert level C

RINTA01\_ALERT\_3\_C The value of Rint is greater than 0.12

Rint given 0.122

|                   |                                                  |       |        |
|-------------------|--------------------------------------------------|-------|--------|
| PLAT020_ALERT_3_C | The Value of Rint is Greater Than 0.12 .....     | 0.122 | Report |
| PLAT026_ALERT_3_C | Ratio Observed / Unique Reflections (too) Low .. | 41%   | Check  |
| PLAT082_ALERT_2_C | High R1 Value .....                              | 0.12  | Report |
| PLAT084_ALERT_3_C | High wR2 Value (i.e. > 0.25) .....               | 0.32  | Report |
| PLAT220_ALERT_2_C | NonSolvent Resd 2 C Ueq(max)/Ueq(min) Range      | 3.5   | Ratio  |
| PLAT220_ALERT_2_C | NonSolvent Resd 3 C Ueq(max)/Ueq(min) Range      | 4.0   | Ratio  |
| PLAT220_ALERT_2_C | NonSolvent Resd 4 C Ueq(max)/Ueq(min) Range      | 4.3   | Ratio  |
| PLAT222_ALERT_3_C | NonSolvent Resd 2 H Uiso(max)/Uiso(min) Range    | 4.2   | Ratio  |
| PLAT222_ALERT_3_C | NonSolvent Resd 3 H Uiso(max)/Uiso(min) Range    | 4.4   | Ratio  |
| PLAT222_ALERT_3_C | NonSolvent Resd 4 H Uiso(max)/Uiso(min) Range    | 5.2   | Ratio  |
| PLAT241_ALERT_2_C | High 'MainMol' Ueq as Compared to Neighbors of   | C5_2  | Check  |
| PLAT241_ALERT_2_C | High 'MainMol' Ueq as Compared to Neighbors of   | C16_3 | Check  |
| PLAT241_ALERT_2_C | High 'MainMol' Ueq as Compared to Neighbors of   | C5_4  | Check  |
| PLAT241_ALERT_2_C | High 'MainMol' Ueq as Compared to Neighbors of   | C16_4 | Check  |
| PLAT241_ALERT_2_C | High 'MainMol' Ueq as Compared to Neighbors of   | C5_5  | Check  |
| PLAT241_ALERT_2_C | High 'MainMol' Ueq as Compared to Neighbors of   | C49_5 | Check  |
| PLAT241_ALERT_2_C | High 'MainMol' Ueq as Compared to Neighbors of   | C5_6  | Check  |
| PLAT241_ALERT_2_C | High 'MainMol' Ueq as Compared to Neighbors of   | C49_6 | Check  |
| PLAT241_ALERT_2_C | High 'MainMol' Ueq as Compared to Neighbors of   | C5_8  | Check  |
| PLAT241_ALERT_2_C | High 'MainMol' Ueq as Compared to Neighbors of   | C16_8 | Check  |
| PLAT242_ALERT_2_C | Low 'MainMol' Ueq as Compared to Neighbors of    | C7_1  | Check  |
| PLAT242_ALERT_2_C | Low 'MainMol' Ueq as Compared to Neighbors of    | C47_1 | Check  |
| PLAT242_ALERT_2_C | Low 'MainMol' Ueq as Compared to Neighbors of    | C48_1 | Check  |
| PLAT242_ALERT_2_C | Low 'MainMol' Ueq as Compared to Neighbors of    | C53_1 | Check  |
| PLAT242_ALERT_2_C | Low 'MainMol' Ueq as Compared to Neighbors of    | C56_1 | Check  |
| PLAT242_ALERT_2_C | Low 'MainMol' Ueq as Compared to Neighbors of    | C56_2 | Check  |
| PLAT242_ALERT_2_C | Low 'MainMol' Ueq as Compared to Neighbors of    | C1_3  | Check  |
| PLAT242_ALERT_2_C | Low 'MainMol' Ueq as Compared to Neighbors of    | C7_3  | Check  |
| PLAT242_ALERT_2_C | Low 'MainMol' Ueq as Compared to Neighbors of    | C10_3 | Check  |
| PLAT242_ALERT_2_C | Low 'MainMol' Ueq as Compared to Neighbors of    | C47_3 | Check  |
| PLAT242_ALERT_2_C | Low 'MainMol' Ueq as Compared to Neighbors of    | C56_3 | Check  |
| PLAT242_ALERT_2_C | Low 'MainMol' Ueq as Compared to Neighbors of    | C6_4  | Check  |
| PLAT242_ALERT_2_C | Low 'MainMol' Ueq as Compared to Neighbors of    | C7_4  | Check  |
| PLAT242_ALERT_2_C | Low 'MainMol' Ueq as Compared to Neighbors of    | C10_4 | Check  |
| PLAT242_ALERT_2_C | Low 'MainMol' Ueq as Compared to Neighbors of    | C56_4 | Check  |
| PLAT242_ALERT_2_C | Low 'MainMol' Ueq as Compared to Neighbors of    | C7_5  | Check  |
| PLAT242_ALERT_2_C | Low 'MainMol' Ueq as Compared to Neighbors of    | C10_5 | Check  |
| PLAT242_ALERT_2_C | Low 'MainMol' Ueq as Compared to Neighbors of    | C48_5 | Check  |
| PLAT242_ALERT_2_C | Low 'MainMol' Ueq as Compared to Neighbors of    | C56_5 | Check  |
| PLAT242_ALERT_2_C | Low 'MainMol' Ueq as Compared to Neighbors of    | C2_6  | Check  |
| PLAT242_ALERT_2_C | Low 'MainMol' Ueq as Compared to Neighbors of    | C7_6  | Check  |

|                   |               |                                       |                                 |         |        |
|-------------------|---------------|---------------------------------------|---------------------------------|---------|--------|
| PLAT242_ALERT_2_C | Low           | 'MainMol'                             | Ueq as Compared to Neighbors of | C10_6   | Check  |
| PLAT242_ALERT_2_C | Low           | 'MainMol'                             | Ueq as Compared to Neighbors of | C47_6   | Check  |
| PLAT242_ALERT_2_C | Low           | 'MainMol'                             | Ueq as Compared to Neighbors of | C56_6   | Check  |
| PLAT242_ALERT_2_C | Low           | 'MainMol'                             | Ueq as Compared to Neighbors of | C7_7    | Check  |
| PLAT242_ALERT_2_C | Low           | 'MainMol'                             | Ueq as Compared to Neighbors of | C10_7   | Check  |
| PLAT242_ALERT_2_C | Low           | 'MainMol'                             | Ueq as Compared to Neighbors of | C48_7   | Check  |
| PLAT242_ALERT_2_C | Low           | 'MainMol'                             | Ueq as Compared to Neighbors of | C56_7   | Check  |
| PLAT242_ALERT_2_C | Low           | 'MainMol'                             | Ueq as Compared to Neighbors of | C10_8   | Check  |
| PLAT242_ALERT_2_C | Low           | 'MainMol'                             | Ueq as Compared to Neighbors of | C46_8   | Check  |
| PLAT242_ALERT_2_C | Low           | 'MainMol'                             | Ueq as Compared to Neighbors of | C47_8   | Check  |
| PLAT242_ALERT_2_C | Low           | 'MainMol'                             | Ueq as Compared to Neighbors of | C48_8   | Check  |
| PLAT242_ALERT_2_C | Low           | 'MainMol'                             | Ueq as Compared to Neighbors of | C53_8   | Check  |
| PLAT242_ALERT_2_C | Low           | 'MainMol'                             | Ueq as Compared to Neighbors of | C56_8   | Check  |
| PLAT250_ALERT_2_C | Large         | U3/U1 Ratio for Average U(i,j) Tensor | ....                            | 2.1     | Note   |
| PLAT260_ALERT_2_C | Large         | Average Ueq of Residue Including      | O1_1                            | 0.139   | Check  |
| PLAT260_ALERT_2_C | Large         | Average Ueq of Residue Including      | O1_3                            | 0.148   | Check  |
| PLAT260_ALERT_2_C | Large         | Average Ueq of Residue Including      | O1_5                            | 0.167   | Check  |
| PLAT260_ALERT_2_C | Large         | Average Ueq of Residue Including      | O1_7                            | 0.159   | Check  |
| PLAT410_ALERT_2_C | Short         | Intra H...H Contact                   | H26_7 ..H43_8 .                 | 1.95    | Ang.   |
|                   |               |                                       | x,y,z =                         | 1_555   | Check  |
| PLAT411_ALERT_2_C | Short         | Inter H...H Contact                   | H5_1 ..H4_6 .                   | 2.02    | Ang.   |
|                   |               |                                       | x,y,z =                         | 1_555   | Check  |
| PLAT413_ALERT_2_C | Short         | Inter XH3 .. XHn                      | H55B_6 ..H51_7 .                | 2.14    | Ang.   |
|                   |               |                                       | 1+x,y,z =                       | 1_655   | Check  |
| PLAT905_ALERT_3_C | Negative      | K value in the Analysis of Variance   | ...                             | -19.453 | Report |
| PLAT911_ALERT_3_C | Missing       | FCF Refl Between Thmin & STh/L=       | 0.558                           | 336     | Report |
| PLAT918_ALERT_3_C | Reflection(s) | with I(obs) much Smaller I(calc)      | .                               | 1       | Check  |

## Alert level G

|                   |                                                  |        |        |
|-------------------|--------------------------------------------------|--------|--------|
| PLAT002_ALERT_2_G | Number of Distance or Angle Restraints on AtSite | 520    | Note   |
| PLAT003_ALERT_2_G | Number of Uiso or Uij Restrained non-H Atoms ... | 520    | Report |
| PLAT083_ALERT_2_G | SHELXL Second Parameter in WGHT Unusually Large  | 20.00  | Why ?  |
| PLAT175_ALERT_4_G | The CIF-Embedded .res File Contains SAME Records | 1      | Report |
| PLAT178_ALERT_4_G | The CIF-Embedded .res File Contains SIMU Records | 3      | Report |
| PLAT333_ALERT_2_G | Large Aver C6-Ring C-C Dist C18_1 -C31_1 .       | 1.44   | Ang.   |
| PLAT333_ALERT_2_G | Large Aver C6-Ring C-C Dist C18_3 -C31_3 .       | 1.44   | Ang.   |
| PLAT333_ALERT_2_G | Large Aver C6-Ring C-C Dist C18_4 -C31_4 .       | 1.44   | Ang.   |
| PLAT333_ALERT_2_G | Large Aver C6-Ring C-C Dist C18_5 -C31_5 .       | 1.44   | Ang.   |
| PLAT333_ALERT_2_G | Large Aver C6-Ring C-C Dist C28_6 -C41_6 .       | 1.42   | Ang.   |
| PLAT333_ALERT_2_G | Large Aver C6-Ring C-C Dist C18_8 -C31_8 .       | 1.44   | Ang.   |
| PLAT606_ALERT_4_G | Solvent Accessible VOID(S) in Structure .....    | !      | Info   |
| PLAT720_ALERT_4_G | Number of Unusual/Non-Standard Labels .....      | 872    | Note   |
| PLAT767_ALERT_4_G | INS Embedded LIST 6 Instruction Should be LIST 4 | Please | Check  |
| PLAT860_ALERT_3_G | Number of Least-Squares Restraints .....         | 9376   | Note   |
| PLAT869_ALERT_4_G | ALERTS Related to the Use of SQUEEZE Suppressed  | !      | Info   |
| PLAT910_ALERT_3_G | Missing # of FCF Reflection(s) Below Theta(Min). | 1      | Note   |
| PLAT933_ALERT_2_G | Number of HKL-OMIT Records in Embedded .res File | 26     | Note   |
| PLAT978_ALERT_2_G | Number C-C Bonds with Positive Residual Density. | 0      | Info   |

0 **ALERT level A** = Most likely a serious problem - resolve or explain  
 2 **ALERT level B** = A potentially serious problem, consider carefully  
 67 **ALERT level C** = Check. Ensure it is not caused by an omission or oversight  
 19 **ALERT level G** = General information/check it is not something unexpected

0 ALERT type 1 CIF construction/syntax error, inconsistent or missing data

68 ALERT type 2 Indicator that the structure model may be wrong or deficient  
14 ALERT type 3 Indicator that the structure quality may be low  
6 ALERT type 4 Improvement, methodology, query or suggestion  
0 ALERT type 5 Informative message, check

---

It is advisable to attempt to resolve as many as possible of the alerts in all categories. Often the minor alerts point to easily fixed oversights, errors and omissions in your CIF or refinement strategy, so attention to these fine details can be worthwhile. In order to resolve some of the more serious problems it may be necessary to carry out additional measurements or structure refinements. However, the purpose of your study may justify the reported deviations and the more serious of these should normally be commented upon in the discussion or experimental section of a paper or in the "special\_details" fields of the CIF. checkCIF was carefully designed to identify outliers and unusual parameters, but every test has its limitations and alerts that are not important in a particular case may appear. Conversely, the absence of alerts does not guarantee there are no aspects of the results needing attention. It is up to the individual to critically assess their own results and, if necessary, seek expert advice.

### **Publication of your CIF in IUCr journals**

A basic structural check has been run on your CIF. These basic checks will be run on all CIFs submitted for publication in IUCr journals (*Acta Crystallographica*, *Journal of Applied Crystallography*, *Journal of Synchrotron Radiation*); however, if you intend to submit to *Acta Crystallographica Section C* or *E* or *IUCrData*, you should make sure that full publication checks are run on the final version of your CIF prior to submission.

### **Publication of your CIF in other journals**

Please refer to the *Notes for Authors* of the relevant journal for any special instructions relating to CIF submission.

---

**PLATON version of 18/05/2022; check.def file version of 17/05/2022**

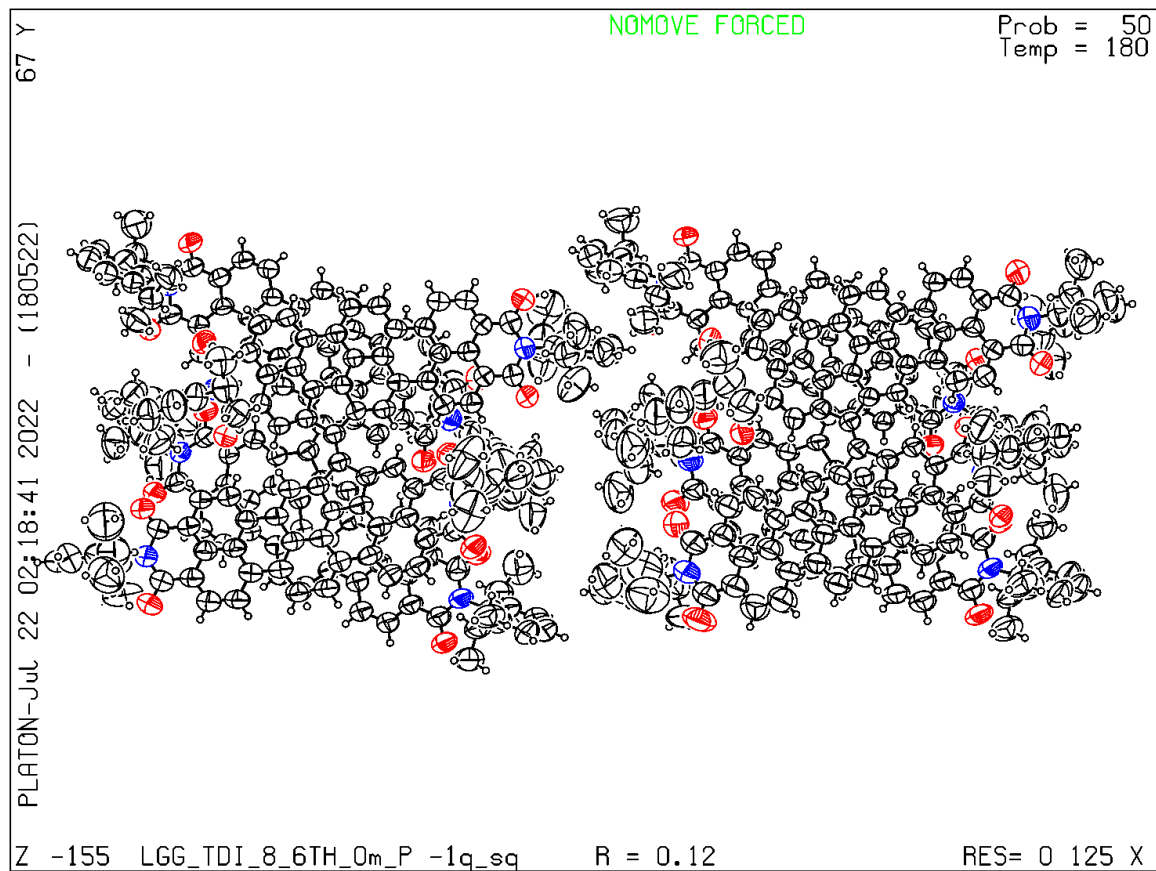

Supplement: Supplementary file 1 [file FV-TDIcheckcif.pdf › FV-TDIcheckcif.pdf]
